# Supplementary material for: Mapping Assessments Instruments for Headache Disorders against the ICF Biopsychosocial Model of Health and Disability
Source: PubMed Central journal article supplement (PMC7795912; doi:10.3390/ijerph18010246), 2020-12-31
Supplement: ijerph-18-00246-s001.pdf [file ijerph-18-00246-s001.pdf]

**Table S1.** Item by item-level ICF-linked categories by domain for each assessment instrument

| <b>Assessment Instruments</b>                                                                                                                                                                                                                                                                                                 | <b>BF</b> | <b>A&amp;P</b>                             | <b>EF</b> | <b>Nd/NC</b> |
|-------------------------------------------------------------------------------------------------------------------------------------------------------------------------------------------------------------------------------------------------------------------------------------------------------------------------------|-----------|--------------------------------------------|-----------|--------------|
| <b>DISABILITY ASSESSMENTS</b>                                                                                                                                                                                                                                                                                                 |           |                                            |           |              |
| <b>MIDAS</b>                                                                                                                                                                                                                                                                                                                  |           |                                            |           |              |
| On how many days in the last 3 months did you miss work or school because of your headaches? / How many days in the last 3 months was your productivity at work or school reduced by half or more because of your headaches?                                                                                                  |           | d830,d850                                  |           |              |
| On how many days in the last 3 months did you not do household work (such as housework, home repairs and maintenance, shopping, caring for children and relatives) because of your headaches? / How many days in the last 3 months was your productivity in household work reduced by half of more because of your headaches? |           | d640,d650,d620,<br>d660                    |           |              |
| On how many days in the last 3 months did you miss family, social or leisure activities because of your headaches?                                                                                                                                                                                                            |           | d750,d760,d920                             |           |              |
| On how many days in the last 3 months did you have a headache?                                                                                                                                                                                                                                                                | b280      |                                            |           |              |
| On average how painful were these headaches?                                                                                                                                                                                                                                                                                  | b280      |                                            |           |              |
| <b>HIT-6</b>                                                                                                                                                                                                                                                                                                                  |           |                                            |           |              |
| When you have headaches, how often is the pain severe?                                                                                                                                                                                                                                                                        | b280      |                                            |           |              |
| How often do headaches limit your ability to do usual daily activities including household work, work, school, or social activities?                                                                                                                                                                                          |           | d230,d640,d650,<br>d620,d830,d850,<br>d920 |           |              |
| When you have a headache, how often do you wish you could lie down?                                                                                                                                                                                                                                                           | b280,b130 |                                            |           |              |
| In the past 4 weeks, how often have you felt too tired to do work or daily activities because of your headaches?                                                                                                                                                                                                              | b130      | d850,d230                                  |           |              |
| In the past 4 weeks, how often have you felt fed up or irritated because of your headaches?                                                                                                                                                                                                                                   | b152      |                                            |           |              |
| In the past 4 weeks, how often did headaches limit your ability to concentrate on work or daily activities?                                                                                                                                                                                                                   | b280      | d160,d230                                  |           |              |
| <b>HDI</b>                                                                                                                                                                                                                                                                                                                    |           |                                            |           |              |
| Do you feel disabled because of your headache?                                                                                                                                                                                                                                                                                |           |                                            |           | nd           |
| Do you feel restricted in performing your routine daily activities?                                                                                                                                                                                                                                                           |           | d230                                       |           |              |
| Do you feel no one understands the effect your headaches have on your life?                                                                                                                                                                                                                                                   |           |                                            |           | nc           |
| Do you restrict your recreational activities (for example, sports, hobbies) because of                                                                                                                                                                                                                                        |           | d920                                       |           |              |

|                                                                                                                                            |      |                |  |    |
|--------------------------------------------------------------------------------------------------------------------------------------------|------|----------------|--|----|
| your headaches?                                                                                                                            |      |                |  |    |
| Do your headaches make you angry?                                                                                                          | b152 |                |  |    |
| Do you feel that you are going to lose control because of your headaches?                                                                  | b130 |                |  |    |
| Are you less likely to socialize because of your headaches?                                                                                |      | d730,d740,d750 |  |    |
| Do you feel like your spouse (or significant other), family and friends have no idea what you are going through because of your headaches? |      |                |  | nc |
| Do you feel your headaches are so bad that you will go insane?                                                                             |      |                |  | nc |
| Is your outlook on the world affected by your headaches?                                                                                   |      |                |  | nc |
| Are you afraid to go outside when you feel a headache is starting?                                                                         |      |                |  | nd |
| Do you feel desperate because of your headaches?                                                                                           | b152 |                |  |    |
| Are you concerned that you are paying penalties at work or at home because of headaches?                                                   |      |                |  | nd |
| Do your headaches place stress on your relationships with family or friends?                                                               |      | d750,d760      |  |    |
| Do you avoid being around people when you have a headache?                                                                                 |      | d750           |  |    |
| Do you believe your headaches are making it difficult for you to achieve your goals in life?                                               |      |                |  | nc |
| Are you unable to think clearly because of your headaches?                                                                                 | b160 |                |  |    |
| Do you get tense (for example, muscle tension) because of your headaches?                                                                  | b780 |                |  |    |
| Do you not enjoy social gatherings because of your headaches?                                                                              |      | d750           |  |    |
| Do you feel irritable because of your headaches?                                                                                           | b152 |                |  |    |
| Do you avoid traveling because of your headaches?                                                                                          |      | d470/d475      |  |    |
| Do your headaches make you feel confused?                                                                                                  | b164 | d163           |  |    |
| Do your headaches make you feel frustrated?                                                                                                | b152 |                |  |    |
| Do you find it difficult to read because of your headaches?                                                                                |      | d166           |  |    |
| Do you find it difficult to focus your attention away from your headaches and on other things?                                             | b140 | d160/d161      |  |    |
| WHODAS 2.0; WHODAS-12                                                                                                                      |      |                |  |    |
| Concentrating on doing something for ten minutes?                                                                                          | b140 | d160/d161      |  |    |
| Remembering to do important things?                                                                                                        | b144 |                |  |    |
| Analysing and finding solutions to problems in day to day life?                                                                            |      | d175           |  |    |
| Learning a new task, for example, learning how to get to a new place?                                                                      |      | d155           |  |    |
| Generally understanding what people say?                                                                                                   |      | d315           |  |    |
| Starting and maintaining a conversation?                                                                                                   |      | d350           |  |    |
| Standing for long periods such as 30 minutes?                                                                                              |      | d415           |  |    |

|                                                                                                                                                                  |      |                |                |    |
|------------------------------------------------------------------------------------------------------------------------------------------------------------------|------|----------------|----------------|----|
| Standing up from sitting down?                                                                                                                                   |      | d410           |                |    |
| Moving around inside your home?                                                                                                                                  |      | d460           |                |    |
| Getting out of your home?                                                                                                                                        |      | d460           |                |    |
| Walking a long distance such as a kilometre [or equivalent]?                                                                                                     |      | d450           |                |    |
| Washing your whole body?                                                                                                                                         |      | d510           |                |    |
| Getting dressed?                                                                                                                                                 |      | d540           |                |    |
| Eating?                                                                                                                                                          |      | d550           |                |    |
| Staying by yourself for a few days?                                                                                                                              |      |                |                | nd |
| Dealing with people you do not know?                                                                                                                             |      | d730           |                |    |
| Maintaining a friendship?                                                                                                                                        |      | d750           |                |    |
| Getting along with people who are close to you?                                                                                                                  |      | d760           |                |    |
| Making new friends?                                                                                                                                              |      | d720           |                |    |
| Sexual activities?                                                                                                                                               |      | d770           |                |    |
| Taking care of your household responsibilities?                                                                                                                  |      | d630/d640/d650 |                |    |
| Doing your most important household tasks well?                                                                                                                  |      | d630/d640/d650 |                |    |
| Getting all the household work done that you needed to do?                                                                                                       |      | d630/d640/d650 |                |    |
| Getting your household work done as quickly as needed?                                                                                                           |      | d630/d640/d650 |                |    |
| Your day to day work?                                                                                                                                            |      | d850           |                |    |
| Doing your most important work tasks well?                                                                                                                       |      | d850           |                |    |
| Getting all the work done that you need to do?                                                                                                                   |      | d850           |                |    |
| Getting your work done as quickly as needed?                                                                                                                     |      | d850           |                |    |
| How much of a problem did you have joining in community activities (for example, festivities, religious or other activities) in the same way as anyone else can? |      | d910,d930      |                |    |
| How much of a problem did you have because of barriers or hindrances in the world around you?                                                                    |      |                | e150,e155,e160 |    |
| How much of a problem did you have living with dignity because of the attitudes and actions of others?                                                           |      |                | e460           |    |
| How much time did you spend on your health condition, or its consequences?                                                                                       |      |                |                | nc |
| How much have you been emotionally affected by your health condition?                                                                                            | b152 |                |                |    |
| How much has your health been a drain on the financial resources of you or your family?                                                                          |      |                | e165           |    |
| How much of a problem did your family have because of your health problems?                                                                                      |      |                |                | nc |
| How much of a problem did you have in doing things by yourself for relaxation or pleasure?                                                                       |      | d920           |                |    |

|                                                                                                                                                                                                                                                      |  |                              |  |    |
|------------------------------------------------------------------------------------------------------------------------------------------------------------------------------------------------------------------------------------------------------|--|------------------------------|--|----|
| HURT                                                                                                                                                                                                                                                 |  |                              |  |    |
| On how many days in the last month did you have a headache?                                                                                                                                                                                          |  |                              |  | nc |
| On how many days in the last three months did your headaches make it hard to work, study or carry out household work?                                                                                                                                |  | d850,d830,<br>d630/d640/d650 |  |    |
| On how many days in the last three months did your headaches spoil or prevent your family, social or leisure activities?                                                                                                                             |  | d760,d750,d920               |  |    |
| On how many days in the last month did you take medication to relieve a headache? (Do not count preventative medication.)                                                                                                                            |  |                              |  | nc |
| When you take your headache medication, does one dose get rid of your headache and keep it away?                                                                                                                                                     |  |                              |  | nc |
| Do you feel in control of your headaches?                                                                                                                                                                                                            |  |                              |  | nc |
| Do you avoid or delay taking your headache medication because you do not like its side-effects?                                                                                                                                                      |  |                              |  | nc |
| What have you been told is your headache diagnosis?                                                                                                                                                                                                  |  |                              |  | nc |
| Do you feel you understand this diagnosis?                                                                                                                                                                                                           |  |                              |  | nc |
| PDI                                                                                                                                                                                                                                                  |  |                              |  |    |
| Family/home responsibilities: This category refers to activities of the home or family. It includes chores or duties performed around the house (eg, yard work) and errands or favors for other family members (eg, driving the children to school). |  | d630,d640,d650,<br>d660      |  |    |
| Recreation: This category includes hobbies, sports, and other similar leisure time activities.                                                                                                                                                       |  | d920                         |  |    |
| Social activity: This category refers to activities that involve participation with friends and acquaintances other than family members. It includes parties, theater, concerts, dining out, and other social functions.                             |  | d920                         |  |    |
| Occupation: This category refers to activities that are a part of or directly related to one's job. This includes nonpaying jobs as well, such as that of a housewife or volunteer worker.                                                           |  | d850,d855                    |  |    |
| Sexual behavior: This category refers to the frequency and quality of one's sex life.                                                                                                                                                                |  | d770                         |  |    |
| Life-support activity: This category refers to basic life-supporting behaviors such as eating, sleeping, and breathing.                                                                                                                              |  | d550                         |  |    |
| PROMIS-PI 6a                                                                                                                                                                                                                                         |  |                              |  |    |
| How much did pain interfere with your day to day activities?                                                                                                                                                                                         |  | d230                         |  |    |
| How much did pain interfere with work around the home?                                                                                                                                                                                               |  | d630                         |  |    |
| How much did pain interfere with your ability to participate in social activities?                                                                                                                                                                   |  | d920                         |  |    |

|                                                                                                                                         |      |                                  |  |    |
|-----------------------------------------------------------------------------------------------------------------------------------------|------|----------------------------------|--|----|
| How much did pain interfere with your household chores?                                                                                 |      | d630,d640,d650                   |  |    |
| How much did pain interfere with the things you usually do for fun?                                                                     |      | d920                             |  |    |
| How much did pain interfere with your enjoyment of social activities?                                                                   |      | d920                             |  |    |
| PROMIS-PI 6b                                                                                                                            |      |                                  |  |    |
| How much did pain interfere with your enjoyment of life?                                                                                |      |                                  |  | nd |
| How much did pain interfere with your ability to concentrate?                                                                           | b140 | d160,d161                        |  |    |
| How much did pain interfere with your day to day activities?                                                                            |      | d230                             |  |    |
| How much did pain interfere with your enjoyment of recreational activities?                                                             |      | d920                             |  |    |
| How much did pain interfere with doing your tasks away from home (e.g., getting groceries, running errands)?                            |      | d620,<br>d630,d640,d650,<br>d430 |  |    |
| How often did pain keep you from socializing with others?                                                                               |      | d720/d730/d740/<br>d750          |  |    |
| PROMIS-PF 10a;                                                                                                                          |      |                                  |  |    |
| Does your health now limit you in doing vigorous activities, such as running, lifting heavy objects, participating in strenuous sports? |      | d455,d430,d920                   |  |    |
| Does your health now limit you in walking more than a mile (1.6 km)?                                                                    |      | d450                             |  |    |
| Does your health now limit you in climbing one flight of stairs?                                                                        |      | d455                             |  |    |
| Does your health now limit you in lifting or carrying groceries?                                                                        |      | d620,d430                        |  |    |
| Does your health now limit you in bending, kneeling, or stooping?                                                                       |      | d410                             |  |    |
| Are you able to do chores such as vacuuming or yard work?                                                                               |      | d445,d640                        |  |    |
| Are you able to dress yourself, including tying shoelaces and buttoning your clothes?                                                   |      | d540                             |  |    |
| Are you able to shampoo your hair?                                                                                                      |      | d510                             |  |    |
| Are you able to wash and dry your body?                                                                                                 |      | d510                             |  |    |
| Are you able to sit on and get up from the toilet?                                                                                      |      | d410,d530                        |  |    |
| NDI                                                                                                                                     |      |                                  |  |    |
| Pain Intensity                                                                                                                          | b280 |                                  |  |    |
| Personal Care (Washing, Dressing, etc.)                                                                                                 |      | d510,d540                        |  |    |
| Lifting                                                                                                                                 |      | d430                             |  |    |
| Reading                                                                                                                                 |      | d166                             |  |    |
| Headaches                                                                                                                               | b280 |                                  |  |    |
| Concentration                                                                                                                           | b140 | d160,d161                        |  |    |
| Work                                                                                                                                    |      | d850                             |  |    |

|                                                                                                                                                |      |                |  |    |
|------------------------------------------------------------------------------------------------------------------------------------------------|------|----------------|--|----|
| Driving                                                                                                                                        |      | d475           |  |    |
| Sleeping                                                                                                                                       | b134 |                |  |    |
| Recreation                                                                                                                                     |      | d920           |  |    |
| HDQ                                                                                                                                            |      |                |  |    |
| How would you rate the usual pain of your headache on a scale from 0 to 10?                                                                    | b280 |                |  |    |
| When you have headaches, how often is the pain severe?                                                                                         | b280 |                |  |    |
| On how many days in the last month did you actually lie down for an hour or more because of your headaches?                                    | b280 |                |  |    |
| When you have a headache, how often do you miss work or school for all or part of the day?                                                     |      | d830,d850      |  |    |
| When you have a headache while you work (or school), how much is your ability to work reduced?                                                 |      | d830,d850      |  |    |
| How many days in the last month have you been kept from performing housework or chores for at least half of the day because of your headaches? |      | d630,d640,d650 |  |    |
| When you have a headache, how much is your ability to perform housework or chores reduced?                                                     |      | d630,d640,d650 |  |    |
| How many days in the last month have you been kept from non-work activities (family, social or recreational) because of your headaches?        |      | d750,d760,d920 |  |    |
| When you have a headache, how much is your ability to engage in non-work activities (family, social or recreational) reduced?                  |      | d750,d760,d920 |  |    |
| CHS                                                                                                                                            |      |                |  |    |
| I am satisfied with my medical treatment.                                                                                                      |      |                |  | nc |
| My medical treatment is effective.                                                                                                             |      |                |  | nc |
| I tolerate my cluster headache medication well.                                                                                                |      |                |  | nc |
| My acute medication is effective.                                                                                                              |      |                |  | nc |
| I suffer from the side effects of my medication.                                                                                               |      |                |  | nc |
| My acute medication for cluster headache causes side effects.                                                                                  |      |                |  | nc |
| My prophylaxis medication for cluster headache causes side effects.                                                                            |      |                |  | nc |
| I am afraid that the disorder could get worse.                                                                                                 |      |                |  | nc |
| I am afraid of a cluster attack.                                                                                                               | b152 |                |  |    |
| I panic when I think about the next cluster attack.                                                                                            | b152 |                |  |    |
| I am worried about the next cluster attack.                                                                                                    | b152 |                |  |    |
| The disease determines my life.                                                                                                                |      |                |  | nc |
| I feel limited in everyday life.                                                                                                               |      | d230           |  |    |

|                                                                                                                    |      |                |                |    |
|--------------------------------------------------------------------------------------------------------------------|------|----------------|----------------|----|
| The disease dominates my daily routine.                                                                            |      | d230           |                |    |
| I withdraw socially due to my disease.                                                                             |      | d920           |                |    |
| I am aggressive in a cluster attack.                                                                               | b130 |                |                |    |
| In cluster attacks I hurt myself.                                                                                  |      |                |                | nc |
| I am impulsive in cluster attacks.                                                                                 | b130 |                |                |    |
| I attempted suicide.                                                                                               |      |                |                | nc |
| I have thoughts of suicide during a cluster attack.                                                                | b152 |                |                |    |
| MFIQ                                                                                                               |      |                |                |    |
| How often did migraine limit your ability to move your head                                                        |      | d410           |                |    |
| How often did migraine limit your ability to move your body                                                        |      | d410           |                |    |
| How often did migraine limit your usual activities that required physical effort                                   |      |                |                | nd |
| How often did you feel that you needed to rest or lie down                                                         | b130 |                |                |    |
| How often did you feel too tired to do things?                                                                     | b130 |                |                |    |
| How difficult was it to make yourself presentable (brushing hair, shaving, make-up)                                |      | d510,d520      |                |    |
| How often did migraine affect your daily routing or schedule                                                       |      | d230           |                |    |
| How often did you have to change your plans                                                                        |      | d230           |                |    |
| How difficult was it to do your usual chores at home (tidying up, cleaning, preparing a meal, doing minor repairs) |      | d630,d640,d650 |                |    |
| How often did migraine limit your ability to do your usual chores outside home                                     |      | d620           |                |    |
| How often did migraine affect your ability to do your usual work or school activities                              |      | d850,d830      |                |    |
| How often did migraine affect your ability to take care of family                                                  |      | d660           |                |    |
| How difficult was it for you to do activities that required you to concentrate                                     |      | d160,d161      |                |    |
| How difficult was it to do activities in the presence of loud noise, strong smell or bright lights                 |      |                | e250,e260,e240 |    |
| How much did migraine affect your usual activities                                                                 |      | d230           |                |    |
| How much did migraine affect your usual social interactions with family, friends or coworkers                      |      | d760,d750,d740 |                |    |
| How difficult was it for you to do activities with family or friends                                               |      | d760,d750      |                |    |
| How much did you have to limit your social activities                                                              |      |                |                | nd |
| How often did you avoid being around other people                                                                  |      |                |                | nd |
| How often did migraine prevent you from being intimate with your partner or spouse                                 |      | d770           |                |    |
| How often did migraine limit your usual leisure activities                                                         |      | d920           |                |    |

|                                                                                                                                                                                                                                 |      |                |  |    |
|---------------------------------------------------------------------------------------------------------------------------------------------------------------------------------------------------------------------------------|------|----------------|--|----|
| How frustrated did you feel about being unable to do what you needed to do                                                                                                                                                      | b152 |                |  |    |
| How often did you worry about your migraines                                                                                                                                                                                    | b152 |                |  |    |
| How often did you feel like a burden on others                                                                                                                                                                                  |      |                |  | nc |
| How often did you feel you lacked control of your life                                                                                                                                                                          |      |                |  | nc |
| How disappointed did you feel about having migraine                                                                                                                                                                             | b152 |                |  |    |
| <b>MPFID</b>                                                                                                                                                                                                                    |      |                |  |    |
| Household chores                                                                                                                                                                                                                |      | d630,d640,d650 |  |    |
| Activities outside the home                                                                                                                                                                                                     |      |                |  | nd |
| Daily routine                                                                                                                                                                                                                   |      | d230           |  |    |
| Concentrate                                                                                                                                                                                                                     | b140 | d160,d161      |  |    |
| Getting ready for day                                                                                                                                                                                                           |      |                |  | nd |
| Avoid interaction                                                                                                                                                                                                               |      | d710,d720      |  |    |
| Rest period                                                                                                                                                                                                                     |      |                |  | nd |
| Overall difficulty with usual activities                                                                                                                                                                                        |      |                |  | nd |
| Difficulty moving head                                                                                                                                                                                                          |      | d410           |  |    |
| Difficulty moving body                                                                                                                                                                                                          |      | d410           |  |    |
| Get out of bed                                                                                                                                                                                                                  |      | d410           |  |    |
| Bend over                                                                                                                                                                                                                       |      | d410           |  |    |
| Activities requiring physical effort                                                                                                                                                                                            |      |                |  | nd |
| <b>WORK-RELATED DIFFICULTIES ASSESSMENTS</b>                                                                                                                                                                                    |      |                |  |    |
| <b>WPAI</b>                                                                                                                                                                                                                     |      |                |  |    |
| Are you currently employed (working for pay)?                                                                                                                                                                                   |      | d850           |  |    |
| During the past seven days, how many hours did you miss from work because of problems associated with your MIGRAINE? Include hours you missed on sick days, times you went in late, left early, etc., because of your MIGRAINE. |      | d850           |  |    |
| During the past seven days, how many hours did you miss from work because of any other reason, such as vacation, holidays, time off to participate in this study?                                                               |      | d850           |  |    |
| During the past seven days, how many hours did you actually work?                                                                                                                                                               |      | d850           |  |    |
| During the past seven days, how much did your MIGRAINE affect your productivity while you were working?                                                                                                                         |      | d850           |  |    |
| During the past seven days, how much did your MIGRAINE affect your ability to do your regular daily activities, other than work at a job?                                                                                       |      | d230           |  |    |
| <b>HEADWORK</b>                                                                                                                                                                                                                 |      |                |  |    |
| Paying attention to work tasks                                                                                                                                                                                                  | b140 | d160,d161      |  |    |



|                                                                                                                                                                    |      |                              |      |    |
|--------------------------------------------------------------------------------------------------------------------------------------------------------------------|------|------------------------------|------|----|
| Solving organizational problems at work                                                                                                                            |      | d175                         |      |    |
| Starting a new work task                                                                                                                                           |      | d210,d220                    |      |    |
| Dealing with work problems                                                                                                                                         |      | d240                         |      |    |
| Reading and writing                                                                                                                                                |      | d166,d170                    |      |    |
| Using the PC                                                                                                                                                       |      | d360                         |      |    |
| Answering the phone                                                                                                                                                |      | d360,d310                    |      |    |
| Driving a car                                                                                                                                                      |      | d475                         |      |    |
| Moving from one place to another                                                                                                                                   |      | d460                         |      |    |
| Talking and interacting with other people                                                                                                                          |      | d350,d710,d720,<br>d740,d750 |      |    |
| Understanding what is said                                                                                                                                         |      | d310                         |      |    |
| Noise in the workplace                                                                                                                                             |      |                              | e250 |    |
| Smell in the workplace                                                                                                                                             |      |                              | e260 |    |
| Brightness of workplace                                                                                                                                            |      |                              | e240 |    |
| Extended working hours                                                                                                                                             |      |                              |      | nd |
| Negative attitudes of colleagues                                                                                                                                   |      |                              | e425 |    |
| Air conditioning                                                                                                                                                   |      |                              | e260 |    |
| <b>QUALITY OF LIFE ASSESSMENTS</b>                                                                                                                                 |      |                              |      |    |
| <b>MSQ</b>                                                                                                                                                         |      |                              |      |    |
| have migraines interfered with how well you dealt with family, friends and others who are close to you?                                                            |      | d750,d760                    |      |    |
| have migraines interfered with your leisure time activities, such as reading or exercising?                                                                        |      | d920,d166                    |      |    |
| have you had difficulty in performing work or daily activities because of migraine symptoms?                                                                       |      | d850,d230<br>d630,d640,d650  |      |    |
| did migraines keep you from getting as much done at work or at home?                                                                                               |      | d850,<br>d630,d640,d650      |      |    |
| did migraines limit your ability to concentrate on work or daily activities?                                                                                       |      | d160,d230,d850               |      |    |
| have migraines left you too tired to do work or daily activities?                                                                                                  | b130 | d230,d850                    |      |    |
| have migraines limited the number of days you have felt energetic?                                                                                                 | b130 |                              |      |    |
| have you had to cancel work or daily activities because you had a migraine?                                                                                        |      | d850,d230                    |      |    |
| did you need help in handling routine tasks such as every day household chores, doing necessary business, shopping, or caring for others, when you had a migraine? |      | d230,d630,d640,<br>d650      |      |    |
| did you have to stop work or daily activities to deal with migraine symptoms?                                                                                      |      | d850,d230                    |      |    |

|                                                                                                                                                                                 |      |                |  |    |
|---------------------------------------------------------------------------------------------------------------------------------------------------------------------------------|------|----------------|--|----|
| were you not able to go to social activities such as parties, dinner with friends, because you had a migraine?                                                                  |      | d760,d920      |  |    |
| have you felt fed up or frustrated because of your migraines?                                                                                                                   | b152 |                |  |    |
| have you felt like you were a burden on others because of your migraines?                                                                                                       |      |                |  | nc |
| have you been afraid of letting others down because of your migraines?                                                                                                          |      |                |  | nc |
| SF-36;SF-12;SF-8                                                                                                                                                                |      |                |  |    |
| In general, would you say your health is                                                                                                                                        |      |                |  | nd |
| Compared to one year ago, how would you rate your health in general now?                                                                                                        |      |                |  | nd |
| Vigorous activities, such as running, lifting heavy objects, participating in strenuous sports                                                                                  |      | d455,d430,d920 |  |    |
| Moderate activities, such as moving a table, pushing a vacuum cleaner, bowling or playing golf                                                                                  |      | d445,d920,     |  |    |
| Lifting or carrying groceries                                                                                                                                                   |      | d430           |  |    |
| Climbing several flights of stairs                                                                                                                                              |      | d455           |  |    |
| Climbing one flight of stairs                                                                                                                                                   |      | d455           |  |    |
| Bending, kneeling or stooping                                                                                                                                                   |      | d410           |  |    |
| Walking more than a mile                                                                                                                                                        |      | d450           |  |    |
| Walking several blocks                                                                                                                                                          |      | d450           |  |    |
| Walking one block                                                                                                                                                               |      | d450           |  |    |
| Bathing or dressing yourself                                                                                                                                                    |      | d510,d540      |  |    |
| Cut down on the amount of time you spent on work or other activities (due to physical health)                                                                                   |      | d850           |  |    |
| Accomplished less than you would like (due to physical health)                                                                                                                  |      |                |  | nc |
| Were limited in the kind of work or other activities (due to physical health)                                                                                                   |      | d850           |  |    |
| Had difficulty performing the work or other activities (for example, it took extra effort) (due to physical health)                                                             |      | d850           |  |    |
| Cut down the amount of time you spent on work or other activities (due to emotional problems)                                                                                   | b152 | d850           |  |    |
| Accomplished less than you would like (due to emotional problems)                                                                                                               |      |                |  | nc |
| Didn't do work or other activities as carefully as usual (due to emotional problems)                                                                                            | b152 | d850           |  |    |
| During the past 4 weeks, to what extent has your physical health or emotional problems interfered with your normal social activities with family, friends, neighbors or groups? | b152 | d750,760,d920  |  |    |
| How much bodily pain have you had during the past 4 weeks?                                                                                                                      | b280 |                |  |    |

|                                                                                                                                                                                  |      |                                            |  |    |
|----------------------------------------------------------------------------------------------------------------------------------------------------------------------------------|------|--------------------------------------------|--|----|
| During the past 4 weeks, how much did pain interfered with your normal work (including both work outside the home and housework)?                                                | b280 | d850,<br>d620,d630,d640,<br>d650           |  |    |
| Did you feel full of pep?                                                                                                                                                        | b152 |                                            |  |    |
| Have you been a very nervous person?                                                                                                                                             | b152 |                                            |  |    |
| have you felt so down in the dumps that nothing could cheer you up?                                                                                                              | b152 |                                            |  |    |
| have you felt calm and peaceful?                                                                                                                                                 | b152 |                                            |  |    |
| Did you have a lot of energy?                                                                                                                                                    | b130 |                                            |  |    |
| Have you felt downhearted and blue?                                                                                                                                              | b152 |                                            |  |    |
| Did you feel worn out?                                                                                                                                                           | b130 |                                            |  |    |
| Have you been a happy person?                                                                                                                                                    | b152 |                                            |  |    |
| Did you feel tired?                                                                                                                                                              | b130 |                                            |  |    |
| During the past 4 weeks, how much of the time has your physical health or emotional problems interfered with your social activities (like visiting with friends, relatives etc)? |      | d920                                       |  |    |
| I seem to get sick a little easier than other people                                                                                                                             |      |                                            |  | nc |
| I am as healthy as anybody I know                                                                                                                                                |      |                                            |  | nc |
| I expect my health to get worse                                                                                                                                                  |      |                                            |  | nc |
| My health is excellent                                                                                                                                                           |      |                                            |  | nc |
| EQ-5D-5L                                                                                                                                                                         |      |                                            |  |    |
| Mobility (i.e. problems in walking about)                                                                                                                                        |      | d450                                       |  |    |
| Self-care (i.e. problems washing or dressing myself)                                                                                                                             |      | d510,d540                                  |  |    |
| Usual activities (e.g. work, study, housework, family or leisure activities)                                                                                                     |      | d850,d830,d630,<br>d640,d650,d660,<br>d920 |  |    |
| Pain/Discomfort                                                                                                                                                                  | b280 |                                            |  |    |
| Anxiety/Depression                                                                                                                                                               | b152 |                                            |  |    |
| CHQQ                                                                                                                                                                             |      |                                            |  |    |
| Work performance                                                                                                                                                                 |      | d850                                       |  |    |
| Household chores                                                                                                                                                                 |      | d630,d640,d650                             |  |    |
| Social life                                                                                                                                                                      |      | d750                                       |  |    |
| Leisure activities                                                                                                                                                               |      | d920                                       |  |    |
| Vacations/awaydays                                                                                                                                                               |      | d920                                       |  |    |
| Physical health                                                                                                                                                                  |      |                                            |  | nc |

|                                                                                               |      |           |           |    |
|-----------------------------------------------------------------------------------------------|------|-----------|-----------|----|
| Appearance                                                                                    |      |           |           | nc |
| Relationship with other family members                                                        |      | d760      |           |    |
| Sexual life                                                                                   |      | d770      |           |    |
| Sleep                                                                                         | b134 |           |           |    |
| Energy                                                                                        | b130 |           |           |    |
| Mood                                                                                          | b152 |           |           |    |
| Memory                                                                                        | b140 |           |           |    |
| Concentration                                                                                 | b140 | d160,d161 |           |    |
| Thinking                                                                                      | b160 | d163      |           |    |
| General health perceptions                                                                    |      |           |           | nc |
| Irritability                                                                                  | b152 |           |           |    |
| Frustration                                                                                   | b152 |           |           |    |
| Abortive medication use                                                                       |      |           |           | nc |
| Financial situation                                                                           |      |           |           | nc |
| Embarrassment due to headaches                                                                |      |           |           | nc |
| Worries about headache                                                                        | b152 |           |           |    |
| Life enjoyment                                                                                |      |           |           | nc |
| EUROHIS-QOL 8-item                                                                            |      |           |           |    |
| How would you rate your quality of life                                                       |      |           |           | nc |
| How satisfied are you with your health                                                        |      |           |           | nc |
| Do you have enough energy for everyday life                                                   | b130 |           |           |    |
| How satisfied are you with your ability to perform your daily activities                      |      | d230      |           |    |
| How satisfied are you with yourself                                                           |      |           |           | nc |
| How satisfied are you with your personal relationships                                        |      | d750,d760 |           |    |
| Have you enough money to meet your needs                                                      |      |           |           | nc |
| How satisfied are you with the conditions of your living place                                |      |           |           | nc |
| 24-Hr MQoLQ                                                                                   |      |           |           |    |
| Have increased sensitivity to light or sound                                                  |      |           | e240,e250 |    |
| Have nausea                                                                                   | b535 |           |           |    |
| Have throbbing head pain                                                                      | b280 |           |           |    |
| Feel upset about having migraine headaches                                                    | b152 |           |           |    |
| Feel physically uncomfortable                                                                 |      |           |           | nd |
| Feel concerned that your migraine medication wouldn't relieve your migraine headache symptoms | b152 |           |           |    |

|                                                                                                                                                        |           |                              |           |    |
|--------------------------------------------------------------------------------------------------------------------------------------------------------|-----------|------------------------------|-----------|----|
| Do normal everyday work (job outside the home, schoolwork, housework)                                                                                  |           | d850,d830,d640,<br>d650,d620 |           |    |
| Stay alert                                                                                                                                             |           |                              |           |    |
| Operate machinery or a motor vehicle (including home appliances and office equipment).                                                                 | b110      |                              |           |    |
| Enjoy life                                                                                                                                             |           |                              |           | nc |
| Interactions with people who are close to you                                                                                                          |           | d750,d760                    |           |    |
| Interactions with other people                                                                                                                         |           | d710,d720,d730,<br>d740      |           |    |
| Energy level                                                                                                                                           | b130      |                              |           |    |
| Ability to have a good night's sleep                                                                                                                   | b134      |                              |           |    |
| Mood                                                                                                                                                   | b152      |                              |           |    |
| CHQ                                                                                                                                                    |           |                              |           |    |
| Avoided leaving the house                                                                                                                              |           |                              |           | nd |
| Avoided making plans due to unpredictability of CH e.g., holidays                                                                                      |           | d230                         |           |    |
| Felt unable to complete duties at work                                                                                                                 |           | d850                         |           |    |
| Had difficulty in getting involved in leisure activities e.g., cinema, theatre, etc.?                                                                  |           | d920                         |           |    |
| Avoided crowded and noisy places e.g., public transport, pubs, etc.                                                                                    |           |                              | e215,e250 |    |
| Felt that the severity of cluster headache affected your daily activities                                                                              |           | d230                         |           |    |
| Been less involved in family affairs e.g., interaction with children, planning holidays                                                                |           | d760                         |           |    |
| Been unable to socialise/spend time with friends and family                                                                                            |           | d750,d760                    |           |    |
| Been unable to achieve your daily goals and carry out routines and chores                                                                              |           | d230                         |           |    |
| Felt less respected by others                                                                                                                          |           |                              |           | nc |
| Had problems with close personal relationship                                                                                                          |           | d760,d770                    |           |    |
| Felt you were a burden on family and friends                                                                                                           |           |                              |           | nc |
| Felt self-conscious and uncomfortable about your appearance after a cluster headache attack (e.g., swelling/redness of eyes and facial sweating, etc.) | b152,b144 |                              |           |    |
| Felt that others are dismissive of your cluster headaches                                                                                              |           |                              |           | nd |
| Felt aggressive                                                                                                                                        | b130,b152 |                              |           |    |
| Felt bad about yourself, lost self-confidence or felt worthless                                                                                        | b152      |                              |           |    |
| Felt like harming yourself or suicidal                                                                                                                 | b152      |                              |           |    |
| Been irritable, impatient or less tolerant                                                                                                             | b152      |                              |           |    |
| Been forgetful e.g., missed appointments                                                                                                               | b144      |                              |           |    |
| Been unable to take care of your appearance (e.g., take a bath, put make-up on,                                                                        |           | d510,d520,d540               |           |    |

|                                                                                  |           |                         |  |
|----------------------------------------------------------------------------------|-----------|-------------------------|--|
| change clothes etc.)                                                             |           |                         |  |
| Felt isolated, lonely or vulnerable                                              | b152      |                         |  |
| Found your pain is unbearable if untreated                                       | b160,b280 |                         |  |
| Dreaded that the headache would not go away                                      | b160,b280 |                         |  |
| Felt lacking in energy and constantly tired                                      | b130      |                         |  |
| Felt sleepy, worn out or less able to concentrate due to nocturnal attacks of CH | b134,b140 | d160,d161               |  |
| Had problems concentrating e.g., reading paper, watching TV, etc.                |           | d160,d161,d166,<br>d110 |  |
| Been unable to think clearly                                                     | b160      |                         |  |
| Felt tense or anxious                                                            | b152      |                         |  |
